# Supplementary material for: N-Terminal Ile-Orn- and Trp-Orn-Motif Repeats Enhance Membrane Interaction and Increase the Antimicrobial Activity of Apidaecins against Pseudomonas aeruginosa
Source: PubMed Central journal article supplement (PMC4861708; doi:10.3389/fcell.2016.00039), 2016-05-10

## Supplement

### **N-Terminal Ile-Orn- and Trp-Orn-Motif Repeats Enhance Membrane Interaction and Increase the Antimicrobial Activity of Apidaecins against *Pseudomonas aeruginosa***

Martina E.C. Bluhm<sup>1,2</sup>, Viktoria A.F. Schneider<sup>3</sup>, Ingo Schäfer<sup>2,4</sup>, Stefania Piantavigna<sup>5</sup>, Tina Goldbach<sup>1,2</sup>, Daniel Knappe<sup>1,2</sup>, Peter Seibel<sup>2,4</sup>, Lisandra L. Martin<sup>5</sup>, Edwin J.A. Veldhuizen<sup>3</sup> and Ralf Hoffmann<sup>1,2</sup>

<sup>1</sup>Institute of Bioanalytical Chemistry, Faculty of Chemistry and Mineralogy, Universität Leipzig, Leipzig, Germany

<sup>2</sup>Center for Biotechnology and Biomedicine (BBZ), Universität Leipzig, Leipzig, Germany

<sup>3</sup>Department of Infectious Diseases and Immunology, Division of Molecular Host Defence, Faculty of Veterinary Medicine, Utrecht University, Utrecht, the Netherlands

<sup>4</sup>Molecular Cell Therapy, Faculty of Medicine, Universität Leipzig, Leipzig, Germany

<sup>5</sup>School of Chemistry, Monash University, Victoria, Australia

#### **Table of contents**

|                                                                                                                                                                                           |          |
|-------------------------------------------------------------------------------------------------------------------------------------------------------------------------------------------|----------|
| <b>Table S1:</b> MIC-values of Api137, Api794, and Api795 determined against <i>P. aeruginosa</i> DSM 1117 and <i>E. coli</i> DSM 1103 using an inoculum of $5 \times 10^8$ cells/mL..... | <b>2</b> |
| <b>Table S2:</b> Quantification of morphological changes of <i>P. aeruginosa</i> DSM 1117 cells.....                                                                                      | <b>2</b> |
| <b>Table S3:</b> Quantification of morphological changes of <i>E. coli</i> DSM 1103 cells.....                                                                                            | <b>3</b> |
| <b>Table S4:</b> Survival rates of HeLa cells after incubating them with Cf-labeled apidaecin peptides.....                                                                               | <b>3</b> |
| <b>Figure S1:</b> RP-HPLC and MALDI-TOF-MS of all purified apidaecin analogs used in this study.....                                                                                      | <b>4</b> |
| <b>Figure S2:</b> RP-HPLC and MALDI-TOF-MS of all purified 5(6)-carboxyfluorescein labeled apidaecin peptides used in this study.....                                                     | <b>6</b> |
| <b>Figure S3:</b> Electron microscopy images with higher magnification of <i>P. aeruginosa</i> .....                                                                                      | <b>7</b> |
| <b>Figure S4:</b> Electron microscopy images with higher magnification of <i>E. coli</i> .....                                                                                            | <b>8</b> |

- Figure S5:** Electron microscopy images of bacteria incubated with high peptide concentrations.....**9**
- Figure S6:** RP-Chromatograms of LL-37, Api137, Api794, and Api795 before and after incubation with *P. aeruginosa* elastase.....**9**
- Figure S7:** Confocal microscopy images with higher magnification of HeLa cells treated with or without dynasore prior to incubation with Cf-labeled apidaecin peptides.....**10**

Table S1: MIC-values in  $\mu\text{g/mL}$  of Api137, Api794, and Api795 determined against *P. aeruginosa* DSM 1117 and *E. coli* DSM 1103 in 50% MHB and 33% TSB, respectively, using an inoculum of  $5 \times 10^8$  cells/mL corresponding to the conditions applied for electron microscopy.

| Peptide | <i>P. aeruginosa</i> DSM1117 |     |        | <i>E. coli</i> DSM 1103 |     |        |
|---------|------------------------------|-----|--------|-------------------------|-----|--------|
|         | 0.25x MIC                    | MIC | 4x MIC | 0.25x MIC               | MIC | 4x MIC |
| Api137  | 32                           | 128 | 512    | 8                       | 32  | 128    |
| Api794  | 16                           | 64  | 256    | 16                      | 64  | 256    |
| Api795  | 4                            | 16  | 64     | 8                       | 32  | 128    |

Table S2: Quantification of morphological changes of *P. aeruginosa* DSM 1117 cells [%].

| Conc.<br>[ $\mu\text{g/mL}$ ] | Membrane |     | Cells |        | DNA/ribosomes<br>relocalization |    |    |     | Ribosome<br>clustering |    |    |     | Vesicle<br>release | dissociated<br>Fragments |    |    |    |    |
|-------------------------------|----------|-----|-------|--------|---------------------------------|----|----|-----|------------------------|----|----|-----|--------------------|--------------------------|----|----|----|----|
|                               | i        | b   | r     | spongy | -                               | +  | ++ | +++ | -                      | +  | ++ | +++ |                    | -                        | +  | ++ | LV |    |
| <b>Water</b> -                | 100      | 0   | 0     | 0      | 90                              | 10 | 0  | 0   | 87                     | 13 | 0  | 0   | 13                 | 87                       | 13 | 0  | 0  |    |
| <b>Api137</b>                 | 32       | 100 | 0     | 0      | 40                              | 43 | 17 | 0   | 37                     | 63 | 0  | 0   | 43                 | 87                       | 13 | 0  | 0  |    |
|                               | 128      | 100 | 0     | 0      | 47                              | 37 | 17 | 0   | 43                     | 57 | 0  | 0   | 47                 | 87                       | 10 | 3  | 0  |    |
|                               | 512      | 100 | 0     | 0      | 47                              | 40 | 13 | 0   | 70                     | 30 | 0  | 0   | 37                 | 97                       | 0  | 3  | 0  |    |
| <b>Api795</b>                 | 4        | 100 | 0     | 0      | 40                              | 37 | 23 | 0   | 30                     | 70 | 0  | 0   | 67                 | 93                       | 3  | 3  | 0  |    |
|                               | 16       | 100 | 0     | 0      | 50                              | 40 | 10 | 0   | 70                     | 30 | 0  | 0   | 13                 | 100                      | 0  | 0  | 0  |    |
|                               | 64       | 90  | 10    | 3      | 10                              | 10 | 67 | 13  | 10                     | 77 | 7  | 7   | 50                 | 97                       | 0  | 3  | 0  |    |
|                               | 512      | 20  | 80    | 63     | 10                              | 0  | 0  | 0   | 100                    | 0  | 0  | 7   | 93                 | 7                        | 87 | 0  | 13 | 0  |
| <b>Api794</b>                 | 16       | 100 | 0     | 0      | 40                              | 37 | 23 | 0   | 20                     | 80 | 0  | 0   | 87                 | 77                       | 10 | 13 | 0  |    |
|                               | 64       | 20  | 80    | 47     | 0                               | 3  | 3  | 10  | 83                     | 3  | 13 | 10  | 73                 | 20                       | 17 | 20 | 63 | 30 |
|                               | 256      | 34  | 67    | 67     | 80                              | 0  | 0  | 0   | 100                    | 0  | 0  | 0   | 100                | 3                        | 7  | 13 | 80 | 93 |
|                               | 512      | 17  | 13    | 17     | 87                              | 0  | 0  | 0   | 100                    | 0  | 0  | 7   | 93                 | 0                        | 40 | 0  | 60 | 97 |

i, intact; b, broken; r, ruptured; DNA/ribosome relocalization and ribosome clustering: -, no; +, starting; ++ relocalized/clustering; +++, extremely relocalized/clustering; fragments: -, no; +, small and thin; ++, long and thin; LV, large vesicles

Tab. S3: Quantification of morphological changes of *E. coli* DSM 1103 cells [%].

|               | Conc.<br>[µg/mL] | Membrane |    | Cell<br>r | DNA/Ribosomes<br>relocalized | Vesicle<br>release |        | Fragments |    |    |     |    |
|---------------|------------------|----------|----|-----------|------------------------------|--------------------|--------|-----------|----|----|-----|----|
|               |                  | i        | w  |           |                              | weak               | strong | -         | +  | ++ | +++ | LV |
| <b>water</b>  | -                | 13       | 87 | 0         | 0                            | 13                 | -      | 33        | 63 | 3  | 0   | 0  |
| <b>Api137</b> | 8                | 100      | 0  | 0         | 17                           | -                  | 100    | 43        | 30 | 27 | 0   | 0  |
|               | 32               | 97       | 3  | 0         | 30                           | -                  | 100    | 37        | 40 | 23 | 0   | 0  |
|               | 128              | 4        | 96 | 0         | 0                            | 35                 | -      | 4         | 54 | 42 | 0   | 0  |
|               | 512              | 32       | 68 | 0         | 0                            | 50                 | -      | 11        | 61 | 29 | 0   | 0  |
| <b>Api795</b> | 8                | 3        | 97 | 0         | 0                            | 30                 | -      | 13        | 63 | 23 | 0   | 0  |
|               | 32               | 7        | 93 | 0         | 0                            | 43                 | -      | 33        | 57 | 10 | 0   | 0  |
|               | 128              | 17       | 83 | 0         | 0                            | 47                 | -      | 17        | 53 | 30 | 0   | 0  |
|               | 512              | 33       | 67 | 0         | 30                           | 60                 | -      | 0         | 63 | 37 | 0   | 0  |
| <b>Api794</b> | 16               | 33       | 67 | 0         | 0                            | -                  | 100    | 37        | 40 | 23 | 0   | 0  |
|               | 64               | 100      | 0  | 0         | 0                            | -                  | 97     | 17        | 27 | 33 | 23  | 3  |
|               | 256              | 3        | 97 | 0         | 0                            | -                  | 97     | 17        | 43 | 37 | 3   | 93 |
|               | 512              | 93       | 7  | 3         | 30                           | -                  | 93     | 17        | 37 | 30 | 17  | 97 |

i, intact; w, wrinkled; r, ruptured; fragments: -, no; +, small and thin; ++, long and thin; +++ long and thick; LV, large vesicles

Table S4: Survival rates of HeLa cells after incubating them with Cf-labeled apidaecin peptides for 10 min or 6 h. The fluorescence corresponding to 5(6)-carboxyfluorescein and eFluor660 to stain dead cells were measured by flow cytometry. Dead cells were excluded from the population. Experiments were performed twice (Exp1/Exp2).

| Time   | Water     | Cf-Api137 | Cf-Api794 | Cf-Api795 |
|--------|-----------|-----------|-----------|-----------|
| 10 min | 90% / 87% | 89% / 85% | 91% / 85% | 90% / 85% |
| 6 h    | 93% / 86% | 93% / 91% | 85% / 84% | 93% / 86% |

Figure S1: RP-HPLC and MALDI-TOF-MS of all purified apidaecin analogs used in this study. RP-HPLC relied on a Jupiter C<sub>18</sub>-column and a linear aqueous acetonitrile gradient from 21-33% (v/v) acetonitrile in 30 min in the presence of TFA (0.1% v/v; left). Mass spectra were recorded on a Synapt G2Si mass spectrometer equipped with a MALDI-source using CHHA as matrix (right).

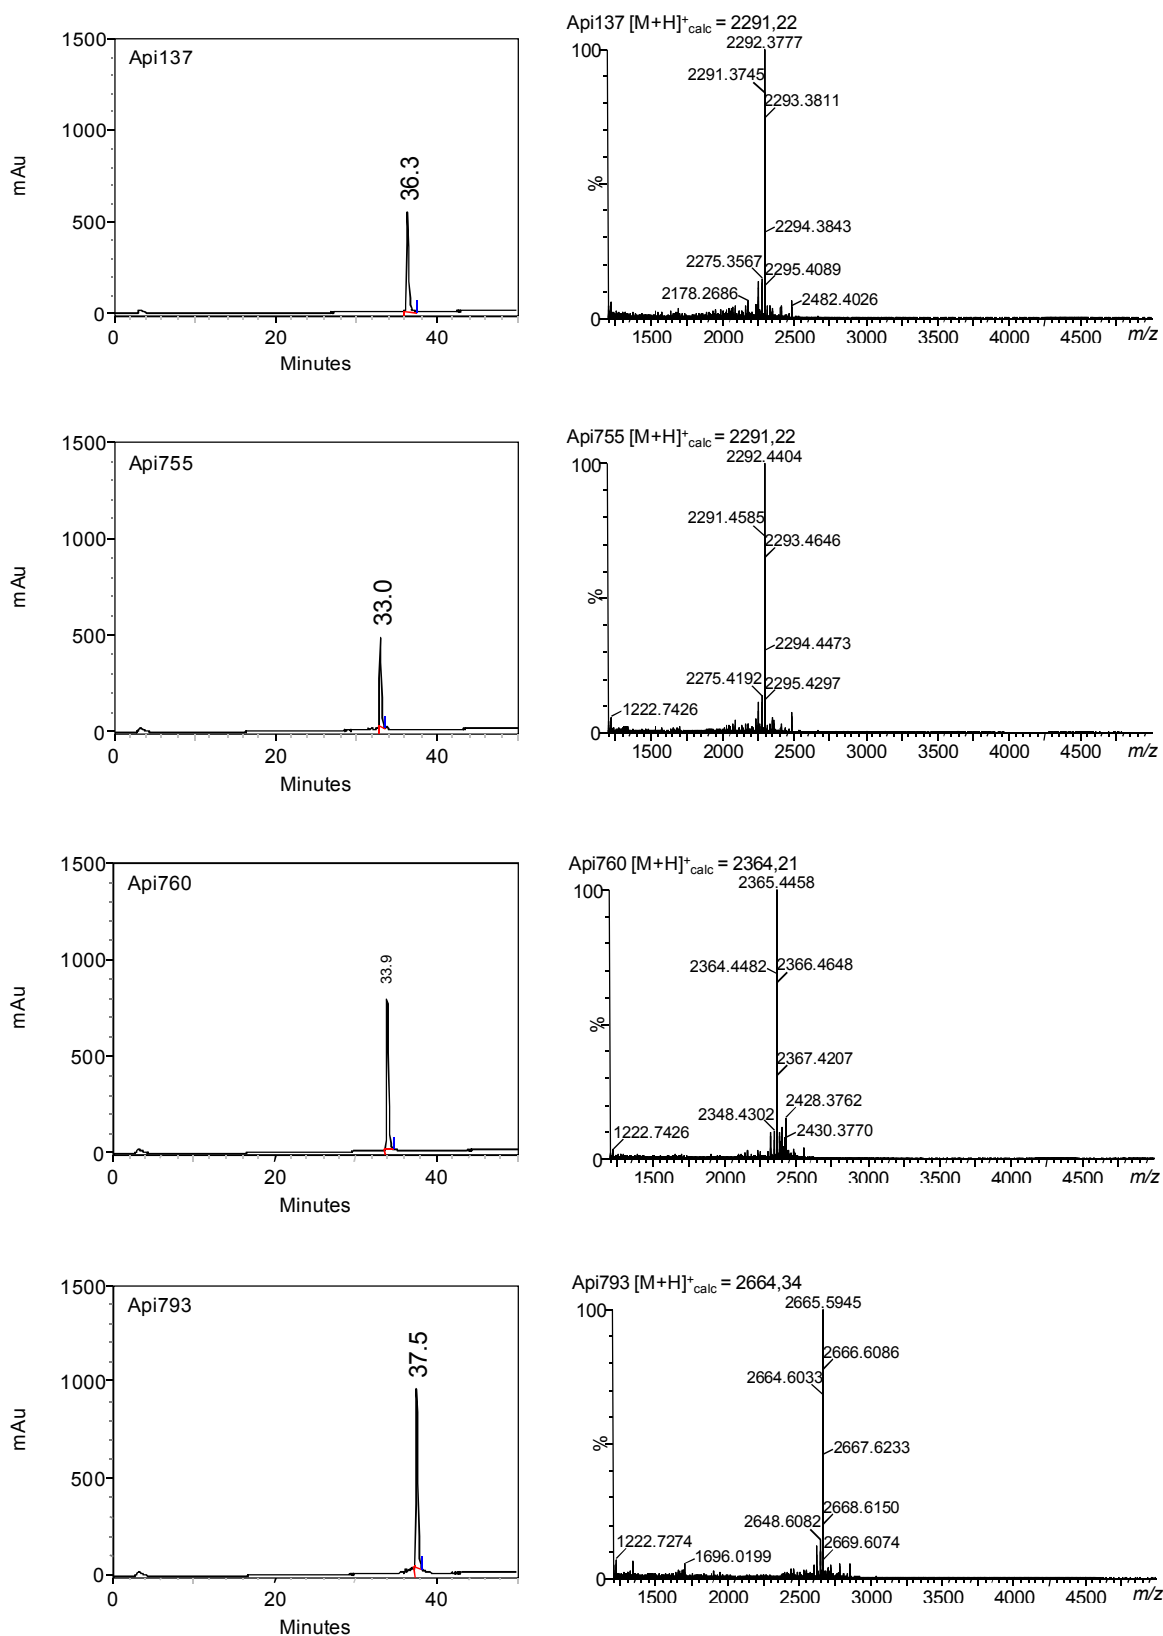

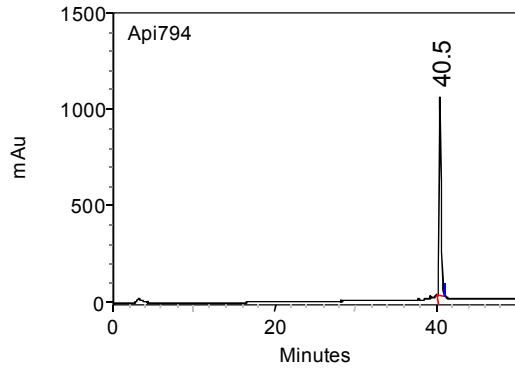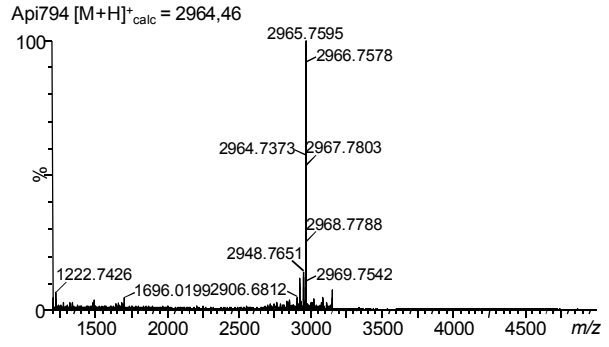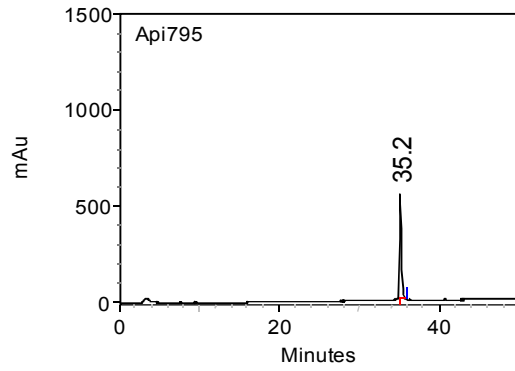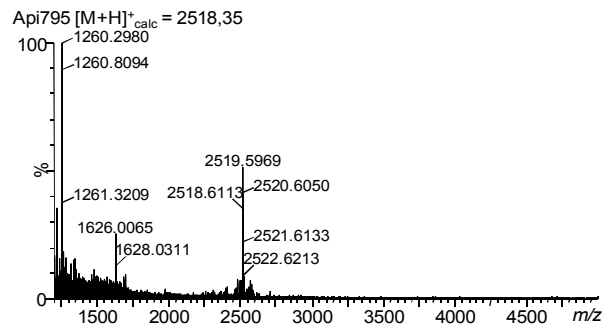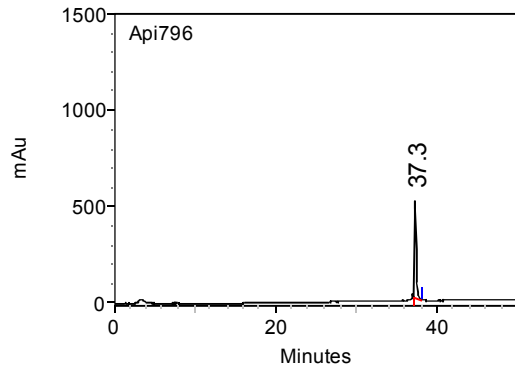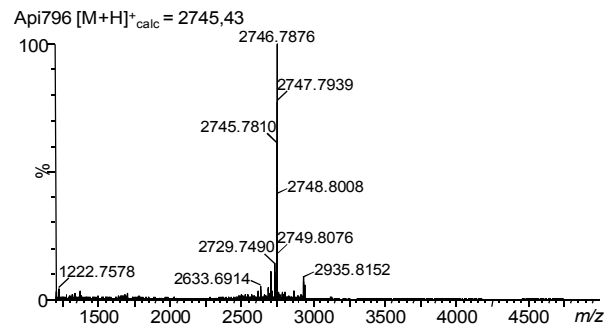

Figure S2: RP-HPLC and MALDI-TOF-MS of all purified 5(6)-carboxyfluorescein labeled apidaecin peptides used in this study. RP-HPLC relied on a Jupiter C<sub>18</sub>-column and a linear aqueous acetonitrile gradient from 31.5-49.5% (v/v) acetonitrile in 30 min in the presence of TFA (0.1% v/v; left). Mass spectra were recorded on a Synapt G2Si mass spectrometer equipped with a MALDI-source using CHHA as matrix (right).

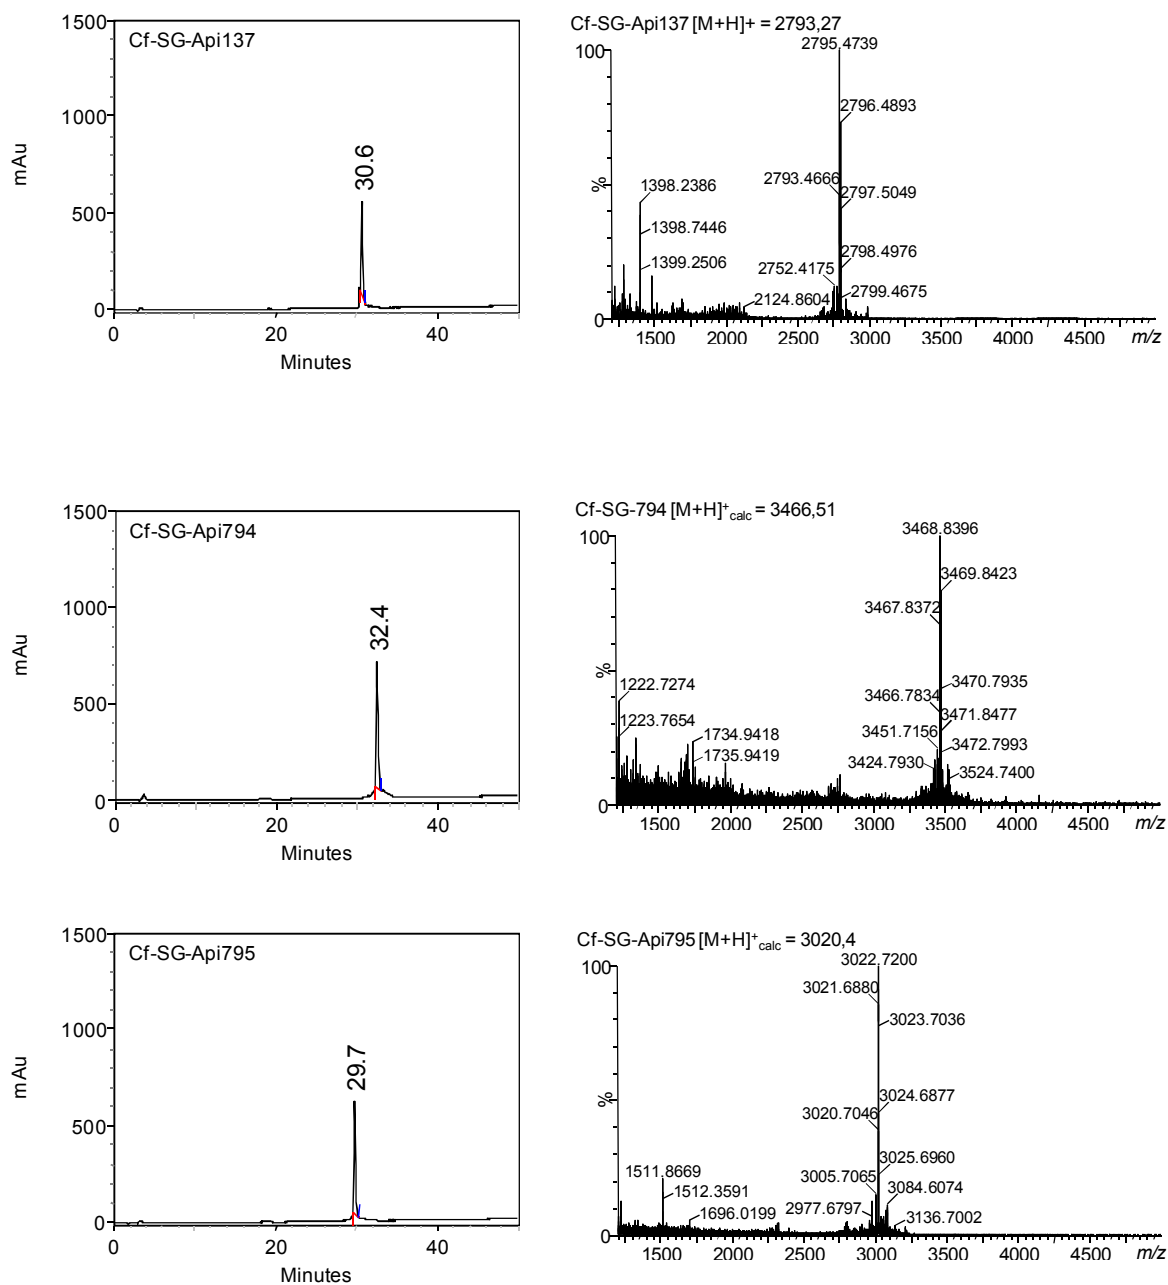

Figure S3: Electron microscopy images of *P. aeruginosa* DSM 1117 incubated with Api137 (A), Api795 (B), and Api794 (C) at concentrations corresponding to 0.25x MIC, MIC, and 4x MIC for 1 h using cell densities of  $5 \times 10^8$  CFU/mL. Black bars represent 200 nm.

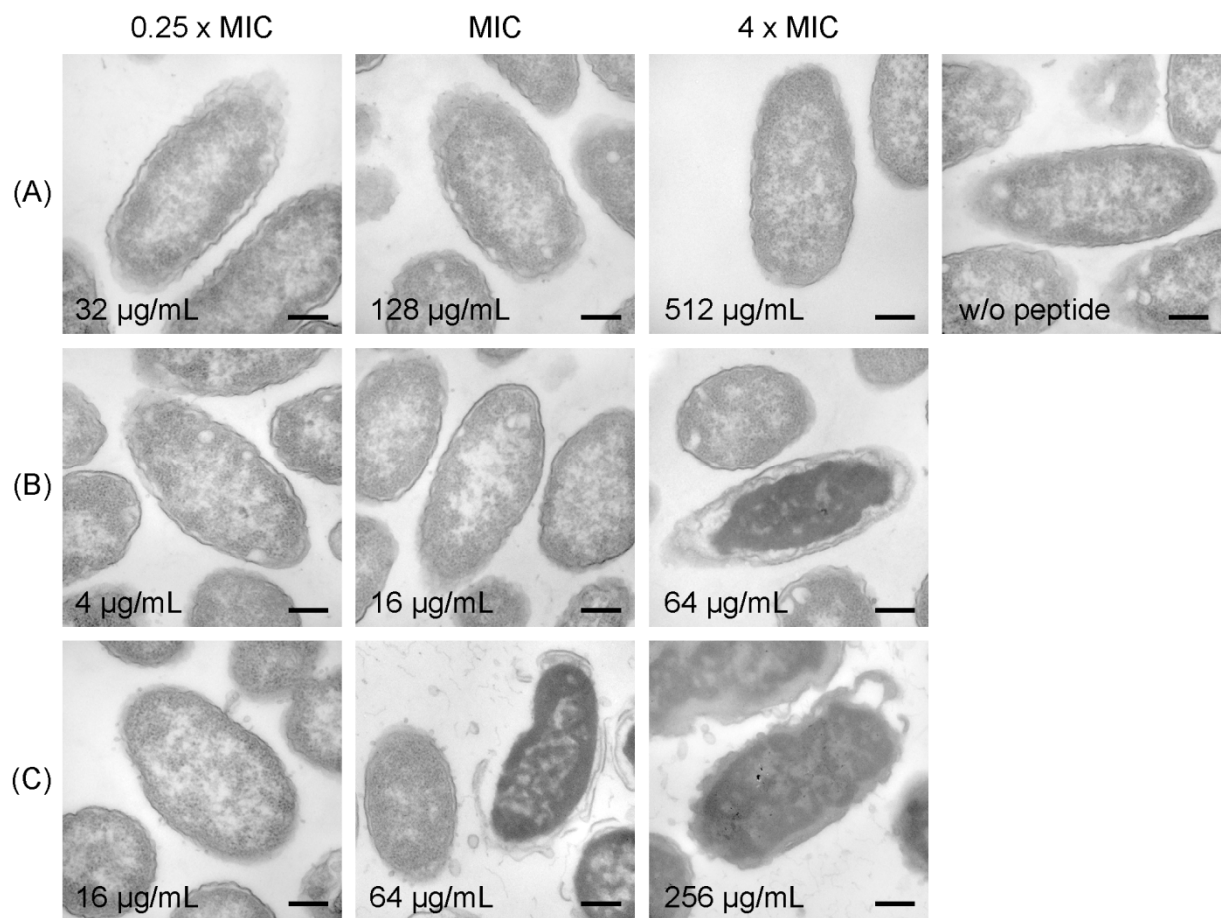

Figure S4: Electron microscopy images of *E. coli* DSM 1103 incubated with Api137 (A), Api795 (B), and Api794 (C) at concentrations corresponding to 0.25x MIC, MIC, and 4x MIC for 1 h using cell densities of  $5 \times 10^8$  CFU/mL. Black bars represent 200 nm.

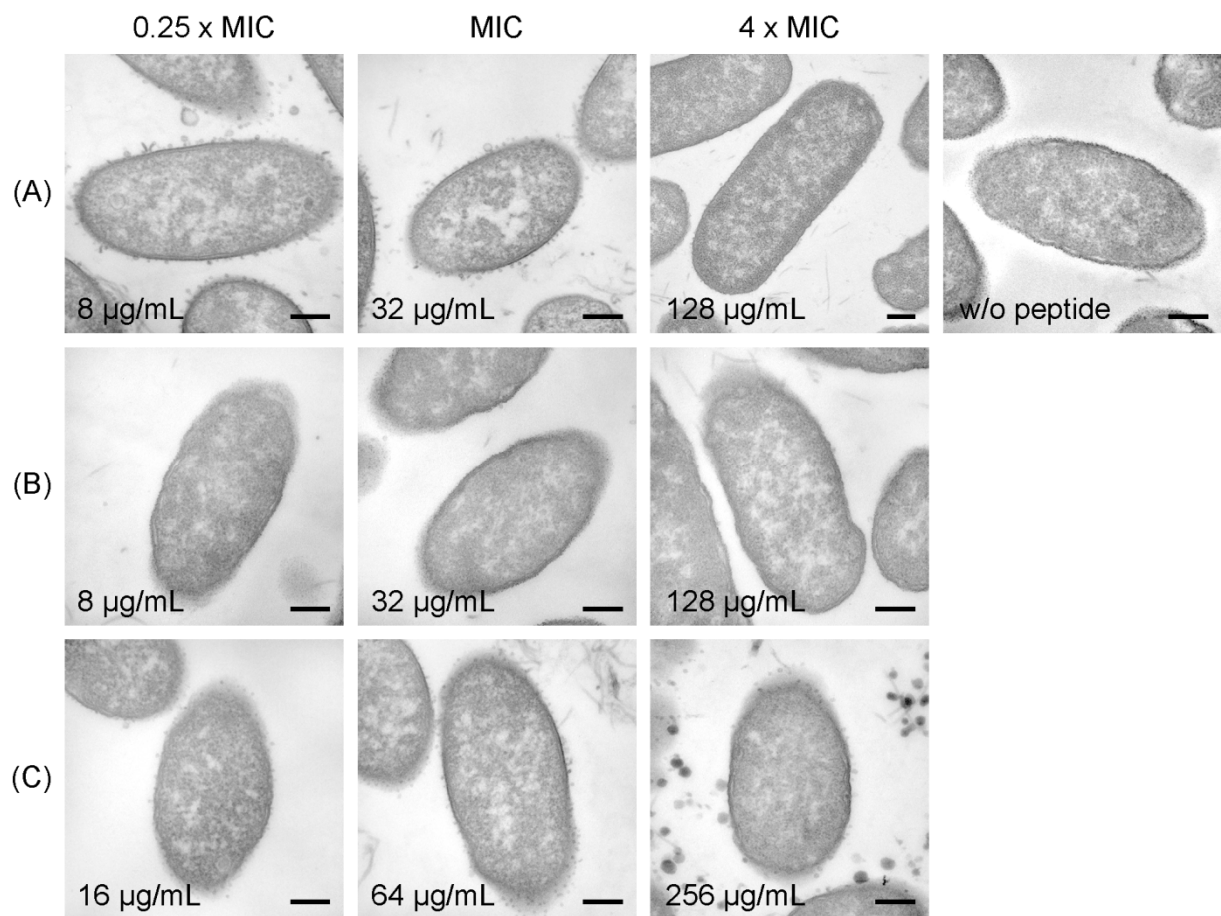



Figure S5: Electron microscopy images of *P. aeruginosa* DSM 1117 (A) and *E. coli* DSM 1103 (B) incubated with the indicated apidaecin analogs (512  $\mu\text{g/mL}$ ) for 1 h using cell densities of  $5 \times 10^8$  CFU/mL. Black bars refer to 500 nm.

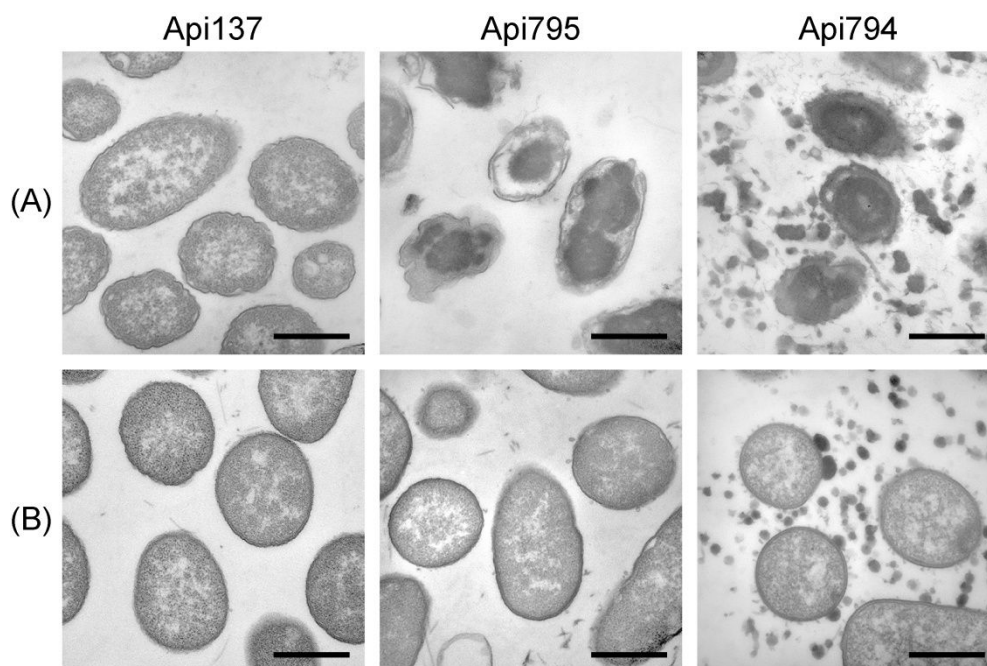

Figure S6: RP-chromatograms of LL-37, Api137, Api794, and Api795 before and after incubation at a concentration of 0.5 g/L with *P. aeruginosa* elastase (12 units/mL) in Tris-HCl buffer (pH 8.3) at 37 °C.

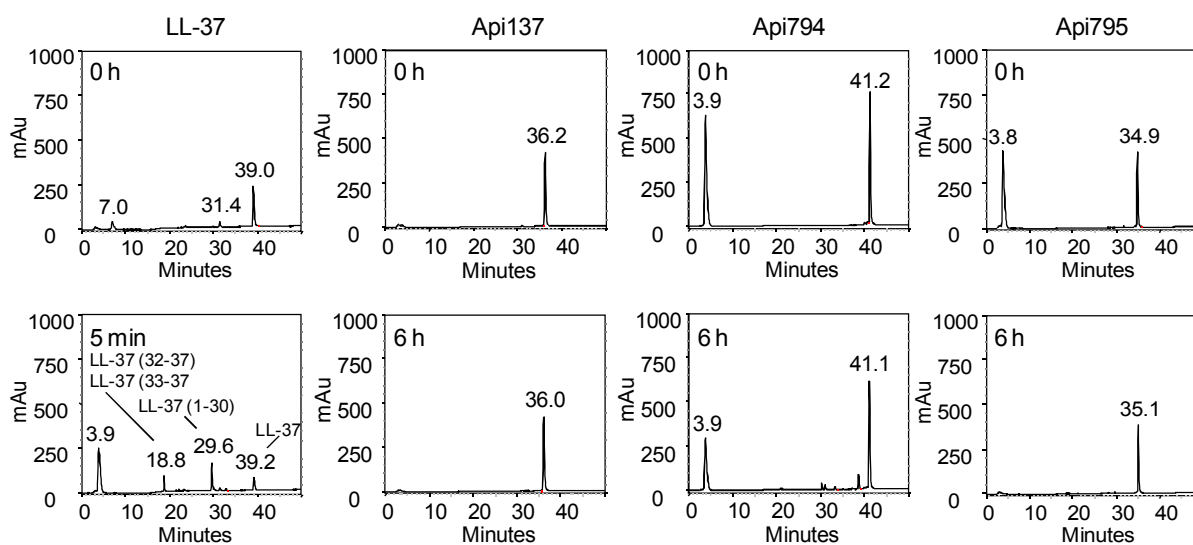

Figure S7: Confocal microscopy images of HeLa cells incubated with Cf-labeled apidaecin peptides (green). Cells were treated without (A) or with dynasore (B); 0.2 mmol/L) for 45 min prior to peptide treatment (40  $\mu$ mol/L, 30 min). The cells' nuclei were visualized by the use of Hoechst 33324 (blue). Bars refer to 20  $\mu$ m. Arrows indicate examples of areas with endosomes (white) and stained cytosol (red).

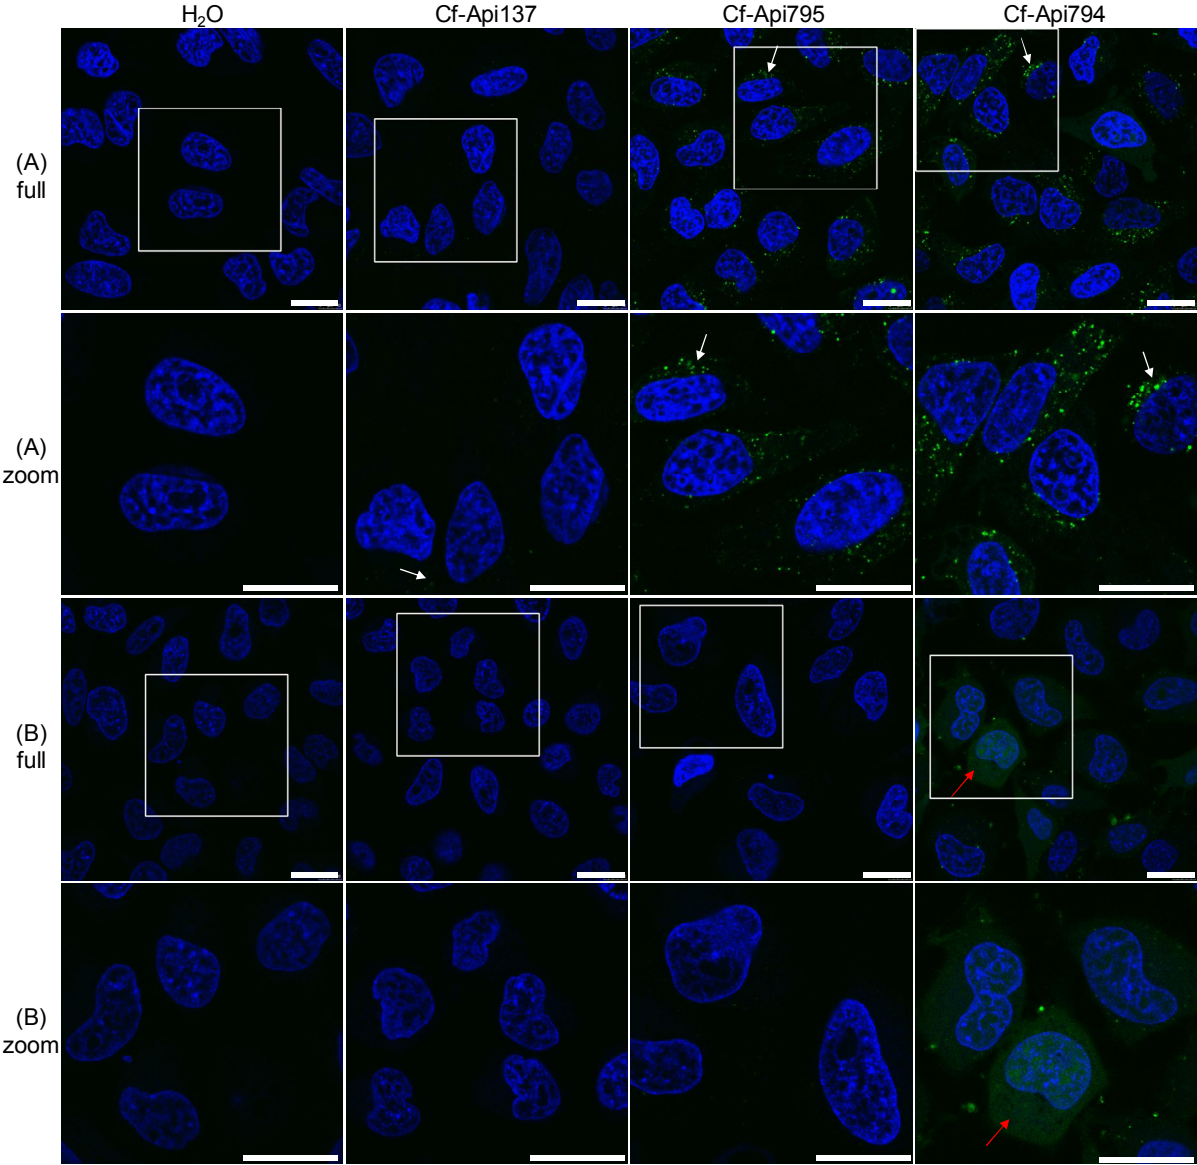

Supplement: Presentation1.pdf [file Presentation1.pdf]
